# Supplementary material
Source: PubMed Central journal article supplement (PMC6288200)
Supplement: mmc1.pdf [file mmc1.pdf]

**The American Journal of Human Genetics, Volume 103**

**Supplemental Data**

**Pathogenic Variants in Fucokinase Cause a  
Congenital Disorder of Glycosylation**

**Bobby G. Ng, Jill A. Rosenfeld, Lisa Emrick, Mahim Jain, Lindsay C. Burrage, Brendan Lee, Undiagnosed Diseases Network, William J. Craigen, David R. Bearden, Brett H. Graham, and Hudson H. Freeze**

## Supplemental Data

**Figure S1 – Determination of newly synthesized [<sup>3</sup>H]- GDP-Fucose and [<sup>3</sup>H]-Fuc1p and lentiviral complementation of primary fibroblasts.**

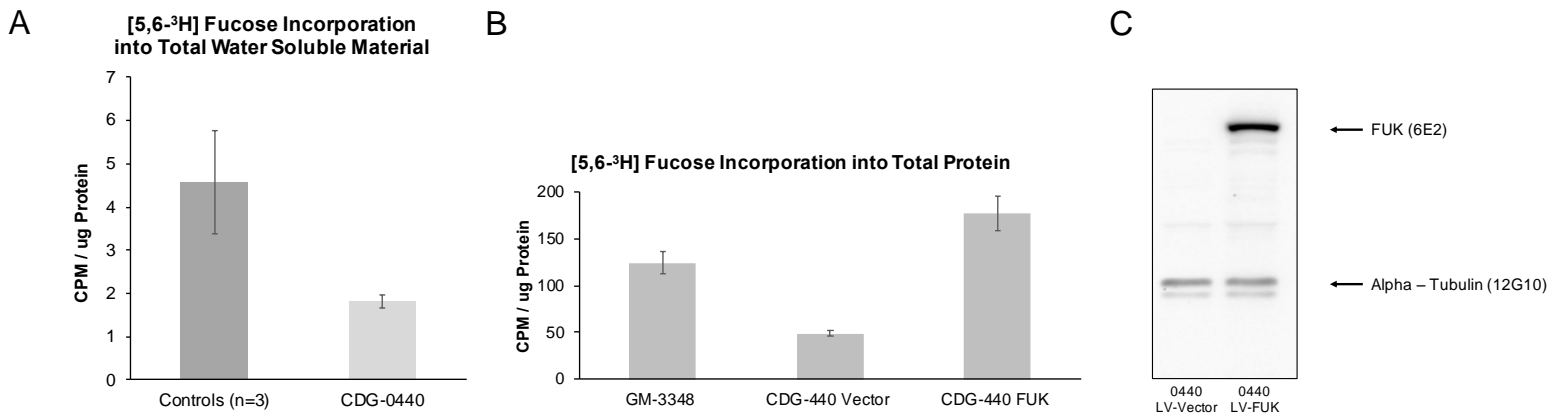

**Figure S1 – Determination of newly synthesized [<sup>3</sup>H]- GDP-Fucose and [<sup>3</sup>H]-Fuc1p and lentiviral complementation of primary fibroblasts.**

(A) Primary fibroblasts (3-controls and CDG-0440 all in triplicates) were metabolically labeled with 2uCi/mL [5,6-<sup>3</sup>H]-fucose for 24hrs to determining the newly synthesized [<sup>3</sup>H]- GDP-Fucose and [<sup>3</sup>H]-Fuc1p, which are purified from a water-soluble extraction. After the extraction of water-soluble metabolites and normalizing samples total protein content, CDG-0440 had a 60% reduction in both [<sup>3</sup>H]- GDP-Fucose and [<sup>3</sup>H]-Fuc1p, when compared to the three controls. (B) Lentiviral transduction into fibroblast from CDG-0440 with either an empty vector carrying GFP or human FUK showing complementation of the [5,6-<sup>3</sup>H]-fucose incorporation into cell associate protein deficiency. (C) Western blot analysis of FUK in lentiviral transduced fibroblast from CDG-0440. The mAb to FUK (6E2) (Thermo Fisher MA5-15847) was used at a 1:1000

dilution. In panel Figure S1A and S1B, experiments were performed in biological triplicates and error bars were calculated as a standard deviation of the group.

**Figure S2 – Characterization of a HAP1-FUK knockout cell line.**

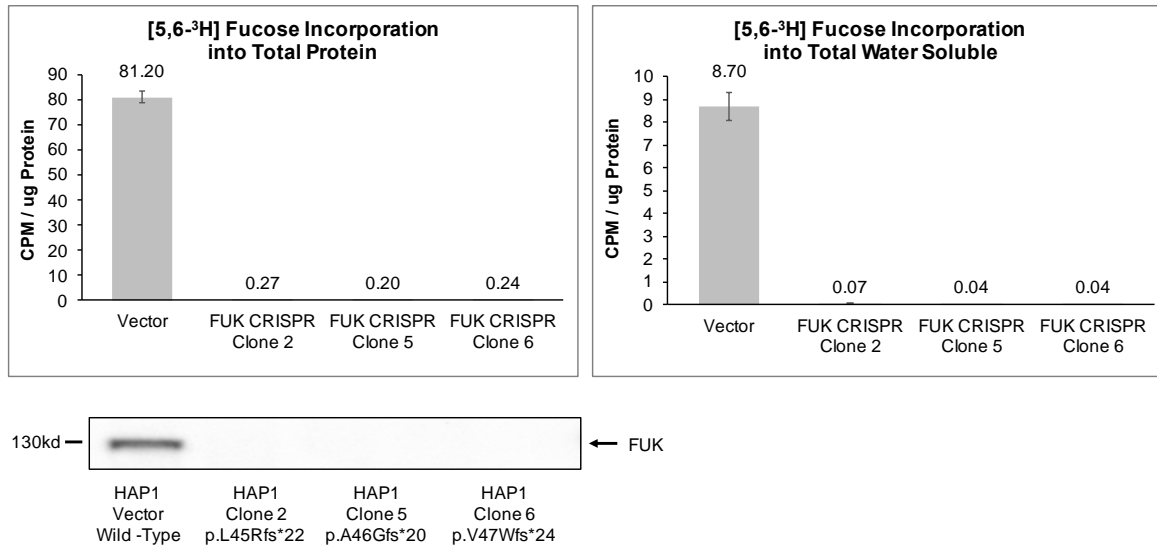

**Figure S2 – Characterization of a HAP1-FUK knockout cell line.**

Metabolic labeling HAP1 cells with 2uCi/mL [5,6-<sup>3</sup>H]-fucose for 24hrs and determining [<sup>3</sup>H]-fucose incorporation into either cell associate proteins (*left panel*) or water-soluble metabolites (*right panel*). Both showing no incorporation of [5,6-<sup>3</sup>H]-fucose into either set. Western blot analysis of the three individual FUK KO clones, confirming the loss of FUK protein (*lower panel*). In panel Figure S2A, experiments were performed in biological triplicates and error bars were calculated as a standard deviation of the group.
